# Supplementary material for: Theoretical Study on Adsorption Behavior of SF6 Decomposition Components on Mg-MOF-74
Source: MDPI journal article supplement (doi:10.3390/nano13111705), 2023-05-23
Supplement: s1 [file s1]

Table S1 The sum of Van der waals radius and covalent radius

| Gas                            | Action atom | The sum of Van der Waals radius (Å) | The sum of covalent radius (Å) |
|--------------------------------|-------------|-------------------------------------|--------------------------------|
| SF <sub>6</sub>                | Mg—F        | 3.44                                | 2.08                           |
| CF <sub>4</sub>                | Mg—F        | 3.44                                | 2.08                           |
| CS <sub>2</sub>                | Mg—S        | 3.87                                | 2.38                           |
| H <sub>2</sub> S               | Mg—S        | 3.87                                | 2.38                           |
| SO <sub>2</sub>                | Mg—O        | 3.45                                | 2.09                           |
| SO <sub>2</sub> F <sub>2</sub> | Mg—O        | 3.45                                | 2.09                           |
| SOF <sub>2</sub>               | Mg—O        | 3.45                                | 2.09                           |

Table S2 Changes in bond length and bond angle before and after SF<sub>6</sub> molecules adsorption

| Bond/angle     | Bond length<br>Before<br>adsorption (Å) | Bond length<br>After<br>adsorption (Å) | Variable<br>Quantity<br>(Å) | Bond angel<br>before<br>Adsorption<br>(°) | Bond angel<br>after<br>Adsorption<br>(°) | Variable<br>Quantity<br>(°) |
|----------------|-----------------------------------------|----------------------------------------|-----------------------------|-------------------------------------------|------------------------------------------|-----------------------------|
| S(1) - F(1)    | 1.581                                   | 1.57391                                | -0.0071                     | -                                         | -                                        | -                           |
| S(1) - F(2)    | 1.581                                   | 1.57638                                | -0.0046                     | -                                         | -                                        | -                           |
| S(1) - F(3)    | 1.581                                   | 1.57714                                | -0.0039                     | -                                         | -                                        | -                           |
| S(1) - F(4)    | 1.581                                   | 1.57928                                | -0.0017                     | -                                         | -                                        | -                           |
| S(1) - F(5)    | 1.581                                   | 1.61249                                | 0.0315                      | -                                         | -                                        | -                           |
| S(1) - F(6)    | 1.581                                   | 1.57625                                | -0.0048                     | -                                         | -                                        | -                           |
| F(1)-S(1)-F(2) | -                                       | -                                      | -                           | 90.00                                     | 90.1991                                  | 0.1991                      |
| F(1)-S(1)-F(3) | -                                       | -                                      | -                           | 90.00                                     | 90.0799                                  | 0.0799                      |
| F(1)-S(1)-F(4) | -                                       | -                                      | -                           | 180.00                                    | 178.7180                                 | -1.2820                     |
| F(1)-S(1)-F(5) | -                                       | -                                      | -                           | 90.00                                     | 89.6022                                  | -0.3978                     |
| F(1)-S(1)-F(6) | -                                       | -                                      | -                           | 90.00                                     | 90.7303                                  | 0.7303                      |
| F(2)-S(1)-F(3) | -                                       | -                                      | -                           | 180.00                                    | 178.8050                                 | -1.1950                     |
| F(2)-S(1)-F(4) | -                                       | -                                      | -                           | 90.00                                     | 89.8452                                  | -0.1548                     |
| F(2)-S(1)-F(5) | -                                       | -                                      | -                           | 90.00                                     | 89.9429                                  | -0.0571                     |
| F(2)-S(1)-F(6) | -                                       | -                                      | -                           | 90.00                                     | 90.5677                                  | 0.5677                      |
| F(3)-S(1)-F(4) | -                                       | -                                      | -                           | 90.00                                     | 89.8499                                  | -0.1501                     |
| F(3)-S(1)-F(5) | -                                       | -                                      | -                           | 90.00                                     | 88.8971                                  | -1.1029                     |
| F(3)-S(1)-F(6) | -                                       | -                                      | -                           | 90.00                                     | 90.5906                                  | 0.5906                      |
| F(4)-S(1)-F(5) | -                                       | -                                      | -                           | 90.00                                     | 89.1160                                  | -0.8840                     |
| F(4)-S(1)-F(6) | -                                       | -                                      | -                           | 90.00                                     | 90.5503                                  | 0.5503                      |
| F(5)-S(1)-F(6) | -                                       | -                                      | -                           | 180.00                                    | 179.3897                                 | -0.6103                     |

Table S3 Changes in bond length and bond angle before and after CF<sub>4</sub> molecules adsorption

| Bond/angle  | Bond length<br>Before<br>adsorption (Å) | Bond length<br>After<br>adsorption (Å) | Variable<br>Quantity<br>(Å) | Bond angel<br>before<br>Adsorption<br>(°) | Bond angel<br>after<br>Adsorption<br>(°) | Variable<br>Quantity<br>(°) |
|-------------|-----------------------------------------|----------------------------------------|-----------------------------|-------------------------------------------|------------------------------------------|-----------------------------|
| C(1) - F(1) | 1.316                                   | 1.34054                                | 0.02454                     | -                                         | -                                        | -                           |
| C(1) - F(2) | 1.316                                   | 1.30977                                | -0.00623                    | -                                         | -                                        | -                           |
| C(1) - F(3) | 1.316                                   | 1.30970                                | -0.00630                    | -                                         | -                                        | -                           |

|                |       |         |          |        |          |         |
|----------------|-------|---------|----------|--------|----------|---------|
| C(1) - F(4)    | 1.316 | 1.30800 | -0.00800 | -      | -        | -       |
| F(1)-C(1)-F(2) | -     | -       | -        | 109.47 | 109.1049 | -0.3651 |
| F(1)-C(1)-F(3) | -     | -       | -        | 109.47 | 108.0986 | -1.3714 |
| F(1)-C(1)-F(4) | -     | -       | -        | 109.47 | 108.9980 | -0.472  |
| F(2)-C(1)-F(3) | -     | -       | -        | 109.47 | 109.9799 | 0.5099  |
| F(2)-C(1)-F(3) | -     | -       | -        | 109.47 | 110.4676 | 0.9976  |
| F(3)-C(1)-F(4) | -     | -       | -        | 109.47 | 110.1428 | 0.6728  |

Table S4 Changes in bond length and bond angle before and after CS<sub>2</sub> molecules adsorption

| Bond/angle     | Bond length<br>Before<br>adsorption (Å) | Bond length<br>After<br>adsorption (Å) | Variable<br>Quantity<br>(Å) | Bond angel<br>before<br>Adsorption<br>(°) | Bond angel<br>after<br>Adsorption<br>(°) | Variable<br>Quantity<br>(°) |
|----------------|-----------------------------------------|----------------------------------------|-----------------------------|-------------------------------------------|------------------------------------------|-----------------------------|
| C(1) - F(1)    | 1.5562                                  | 1.56695                                | 0.01075                     | -                                         | -                                        | -                           |
| C(1) - F(2)    | 1.5562                                  | 1.54702                                | -0.00918                    | -                                         | -                                        | -                           |
| F(3)-C(1)-F(4) | -                                       | -                                      | -                           | 180.00                                    | 179.8291                                 | -0.1709                     |

Table S5 Changes in bond length and bond angle before and after H<sub>2</sub>S molecules adsorption

| Bond/angle     | Bond length<br>Before<br>adsorption (Å) | Bond length<br>After<br>adsorption (Å) | Variable<br>Quantity<br>(Å) | Bond angel<br>before<br>Adsorption<br>(°) | Bond angel<br>after<br>Adsorption<br>(°) | Variable<br>Quantity<br>(°) |
|----------------|-----------------------------------------|----------------------------------------|-----------------------------|-------------------------------------------|------------------------------------------|-----------------------------|
| C(1) - F(1)    | 1.349                                   | 1.35179                                | 0.00279                     | -                                         | -                                        | -                           |
| C(1) - F(2)    | 1.349                                   | 1.35168                                | 0.00268                     | -                                         | -                                        | -                           |
| F(3)-C(1)-F(4) | -                                       | -                                      | -                           | 92.12                                     | 92.8788                                  | 0.7588                      |

Table S6 Changes in bond length and bond angle before and after SO<sub>2</sub> molecules adsorption

| Bond/angle     | Bond length<br>Before<br>adsorption (Å) | Bond length<br>After<br>adsorption (Å) | Variable<br>Quantity<br>(Å) | Bond angel<br>before<br>Adsorption<br>(°) | Bond angel<br>after<br>Adsorption<br>(°) | Variable<br>Quantity<br>(°) |
|----------------|-----------------------------------------|----------------------------------------|-----------------------------|-------------------------------------------|------------------------------------------|-----------------------------|
| C(1) - F(1)    | 1.454                                   | 1.47074                                | 0.01674                     | -                                         | -                                        | -                           |
| C(1) - F(2)    | 1.454                                   | 1.45433                                | 0.00033                     | -                                         | -                                        | -                           |
| F(3)-C(1)-F(4) | -                                       | -                                      | -                           | 118.59                                    | 116.4651                                 | -2.1249                     |

Table S7 Changes in bond length and bond angle before and after SO<sub>2</sub>F<sub>2</sub> molecules adsorption

| Bond/angle     | Bond length<br>Before<br>adsorption (Å) | Bond length<br>After<br>adsorption (Å) | Variable<br>Quantity<br>(Å) | Bond angel<br>before<br>Adsorption<br>(°) | Bond angel<br>after<br>Adsorption<br>(°) | Variable<br>Quantity<br>(°) |
|----------------|-----------------------------------------|----------------------------------------|-----------------------------|-------------------------------------------|------------------------------------------|-----------------------------|
| C(1) - F(1)    | 1.575                                   | 1.56815                                | -0.00685                    | -                                         | -                                        | -                           |
| C(1) - F(2)    | 1.575                                   | 1.56689                                | -0.00811                    | -                                         | -                                        | -                           |
| C(1) - F(3)    | 1.424                                   | 1.42102                                | -0.00298                    | -                                         | -                                        | -                           |
| C(1) - F(4)    | 1.424                                   | 1.43450                                | 0.01050                     | -                                         | -                                        | -                           |
| F(1)-C(1)-F(2) | -                                       | -                                      | -                           | 94.8349                                   | 95.3059                                  | 0.4710                      |

|                |   |   |   |          |          |         |
|----------------|---|---|---|----------|----------|---------|
| F(1)-C(1)-F(3) | - | - | - | 107.9328 | 108.0827 | 0.1499  |
| F(1)-C(1)-F(4) | - | - | - | 107.9394 | 105.7348 | -2.2046 |
| F(2)-C(1)-F(3) | - | - | - | 107.9328 | 108.6352 | 0.7024  |
| F(2)-C(1)-F(3) | - | - | - | 107.9394 | 107.7750 | -0.1644 |
| F(3)-C(1)-F(4) | - | - | - | 125.8551 | 126.7594 | 0.9043  |

Table S8 Changes in bond length and bond angle before and after SOF<sub>2</sub> molecules adsorption

| Bond/angle     | Bond length<br>Before<br>adsorption (Å) | Bond length<br>After<br>adsorption (Å) | Variable<br>Quantity<br>(Å) | Bond angel<br>before<br>Adsorption<br>(°) | Bond angel<br>after<br>Adsorption<br>(°) | Variable<br>Quantity<br>(°) |
|----------------|-----------------------------------------|----------------------------------------|-----------------------------|-------------------------------------------|------------------------------------------|-----------------------------|
| C(1) - F(1)    | 1.616                                   | 1.60000                                | -0.01600                    | -                                         | -                                        | -                           |
| C(1) - F(2)    | 1.616                                   | 1.60589                                | -0.00589                    | -                                         | -                                        | -                           |
| C(1) - F(3)    | 1.437                                   | 1.44700                                | 0.01000                     | -                                         | -                                        | -                           |
| F(2)-C(1)-F(3) | -                                       | -                                      | -                           | 92.64                                     | 93.6346                                  | 0.9946                      |
| F(2)-C(1)-F(3) | -                                       | -                                      | -                           | 106.71                                    | 106.7621                                 | 0.0521                      |
| F(3)-C(1)-F(4) | -                                       | -                                      | -                           | 106.71                                    | 106.6037                                 | -0.1063                     |
